# Supplementary material
Source: PubMed Central journal article supplement (PMC3725069)
Supplement: 1218701110_pnas.201218701SI.pdf [file 1218701110_pnas.201218701SI.pdf]

# Supporting Information

## Underwood and Somerville 10.1073/pnas.1218701110

### SI Materials and Methods

**Arabidopsis Growth Conditions and Transformation.** *Arabidopsis* seeds were sown on soil (Pro-Mix HP; Premier Horticulture) and stratified for 3 d at 4 °C. Plants were grown in growth chambers (Convion) with a 12-h photoperiod at light intensities of 120  $\mu\text{M m}^{-2} \text{s}^{-1}$  in the 400- to 700-nm range, 70% relative humidity, and temperatures of 22 °C during the light period and 21 °C during the dark period. The PEN3 promoter-PEN3-GFP transgenic line and *pen3-3* (SALK\_110926) (1) mutant line used in this study are described in ref. 2. Transformation of *Arabidopsis* was carried out by the floral dip method (3).

**Powdery Mildew and Bacterial Inoculations.** *Blumeria graminis* f. sp. *hordei* (Bgh) race CR3 was maintained on barley variety CI-16138 (AlgerianS). Inoculations were carried out as previously described (4). *Escherichia coli* carrying *Discosoma* sp. red fluorescent protein (dsRED) in the plasmid pGEM-T easy were grown overnight in LB medium, pelleted by centrifugation for 2 min at 3,000  $\times g$ , and resuspended in H<sub>2</sub>O at 10<sup>8</sup> cfu/mL. The bacterial suspension was infiltrated into leaves using a 1-mL needleless syringe, and inoculated leaves were imaged at 24 h postinoculation (hpi) by confocal microscopy as described below.

**Pharmacological Inhibitor and TAMRA-flg22 Stock Solutions and Handling.** Pharmacological inhibitors were prepared as stock solutions in DMSO at the following concentrations: cytochalasin E (AG Scientific), 2 mg/mL; latrunculin B (Sigma), 10 mM; and oryzalin (Sigma), 100 mM. All DMSO stocks were stored at -20 °C. Brefeldin A (Sigma) was prepared as a stock solution at 10 mg/mL in 100% EtOH and stored at 4 °C. Monensin (Sigma) was prepared as a stock solution at 10 mM in 100% EtOH and stored at -20 °C. Colchicine was prepared as a stock solution at 40 mg/mL in H<sub>2</sub>O and stored at -20 °C. Cycloheximide (CHX) was prepared as a stock solution at 5 mg/mL in H<sub>2</sub>O and stored at 4 °C; 5-TAMRA-flg22 peptide was synthesized by Elim Biopharmaceuticals at a purity level of  $\geq 70\%$ . Stocks were prepared by dissolving the peptide in H<sub>2</sub>O at a concentration of 10 mM,

and they were stored at -20 °C and subsequently diluted in H<sub>2</sub>O to the specified concentration for experiments.

**CHX Validation.** For CHX validation, leaves from 3-wk-old *Arabidopsis* Col-0 plants were syringe-infiltrated with H<sub>2</sub>O or 5  $\mu\text{g/mL}$  CHX. After 1 h, treated leaves were syringe-infiltrated with 100  $\mu\text{Ci/mL}$  TRAN35S metabolic labeling reagent (MP Bio-medicals). Treated leaves were collected at 4, 12, and 24 h after CHX/H<sub>2</sub>O treatment, and proteins were extracted by freezing leaf tissue (one leaf per sample) in liquid N<sub>2</sub>, grinding to powder, and homogenizing in 100  $\mu\text{L}$  2 $\times$  SDS/PAGE sample buffer. Samples were centrifuged for 10 min at 15,000  $\times g$  at 4 °C to pellet cell debris, and supernatants were boiled for 10 min; 25  $\mu\text{L}$  each protein sample were separated on a 4–15% gradient SDS gel (Bio-Rad). The gel was stained with Gelcode Blue Reagent (Thermo Fisher), photographed, and exposed to autoradiography film (Thermo Fisher) for 48 h at -80 °C. The film was developed using a Kodak X-omat 2000 Developer.

**Bacterial Multiplication Assays.** Bacteria for plant inoculations were grown to midlog phase in 10-mL liquid cultures. *E. coli* DH5 $\alpha$  was grown in LB medium (5), and *Pseudomonas syringae* pv. *tomato* DC3000 *hrcC* was grown in low-salt (5 g/L) LB amended with 60 mg/L rifampicin. Bacterial cultures were centrifuged at 3,000  $\times g$  and resuspended in sterile water to OD<sub>600</sub> = 0.002 (10<sup>6</sup> cfu/mL). Bacterial suspensions were infiltrated into leaves of 3- to 4-wk-old plants using a needleless 1-mL syringe against the abaxial leaf surface. After inoculation, plants were left uncovered until leaves were no longer water-soaked and then covered with a humidity dome for the remainder of the experiment. Bacterial populations in the apoplast were determined at days 0, 3, and 5 using a previously described method (6). A correction factor was calculated to equalize day 0 values, and this correction factor was used to normalize days 3 and 5 values for comparison. All bacterial multiplication assays were repeated three times with similar results.

1. Alonso JM, et al. (2003) Genome-wide insertional mutagenesis of *Arabidopsis thaliana*. *Science* 301(5633):653–657.
2. Stein M, et al. (2006) *Arabidopsis* PEN3/PDR8, an ATP binding cassette transporter, contributes to nonhost resistance to inappropriate pathogens that enter by direct penetration. *Plant Cell* 18(3):731–746.
3. Clough SJ, Bent AF (1998) Floral dip: A simplified method for *Agrobacterium*-mediated transformation of *Arabidopsis thaliana*. *Plant J* 16(6):735–743.
4. Zimmerli L, Stein M, Lipka V, Schulze-Lefert P, Somerville S (2004) Host and non-host pathogens elicit different jasmonate/ethylene responses in *Arabidopsis*. *Plant J* 40(5): 633–646.
5. Sambrook J, Fritsch E, Maniatis T (1989) *Molecular Cloning: A Laboratory Manual* (Cold Spring Harbor Lab Press, Plainview, NY).
6. Katagiri F, Thilmony R, He SY (2002) The *Arabidopsis thaliana*-*Pseudomonas syringae* interaction. *The Arabidopsis Book*, eds Meyerowitz EM, Somerville CR (American Society of Plant Biologists, Rockville, MD).

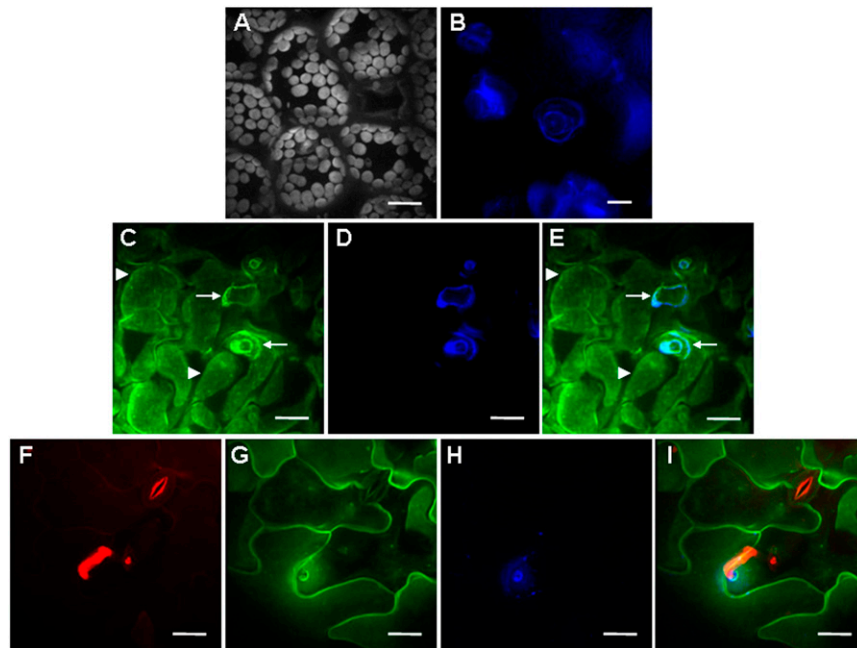

**Fig. S1.** PEN3-GFP and callose colocalize at focal accumulations (FAs) in flg22- and *Bgh*-treated leaves. (A) Confocal image of the mesophyll cell layer of a Col WT leaf 24 h after treatment with 5  $\mu$ M flg22. No autofluorescent rings or bull's eye structures were observed. (B) Aniline blue-stained callose deposited 24 h after syringe infiltration of WT leaves with 5  $\mu$ M flg22. (C) Localization of PEN3-GFP in mesophyll cells 24 h after syringe infiltration of 5  $\mu$ M flg22. (D) Localization of sirofluor-stained callose in mesophyll cells 24 h after syringe infiltration of 5  $\mu$ M flg22. (E) Overlay of C and D showing colocalization of PEN3-GFP and callose at flg22-induced FAs. (F) Propidium iodide-stained *Bgh* appressorium. Autofluorescence of stomatal guard cells is also visible in this channel. (G) Localization of PEN3-GFP in epidermal cells 24 h after inoculation with *Bgh*. (H) Localization of sirofluor-stained callose in epidermal cells 24 h after inoculation with *Bgh*. (I) Overlay of F–I showing colocalization of PEN3-GFP and callose at the site of attempted penetration by *Bgh*. Arrowheads in C and E indicate PEN3-GFP-labeled plasma membrane (PM) outlines of leaf mesophyll cells. Arrows in C and E indicate rings of PEN3-GFP FA. A and C–I are z-projected confocal images. (Scale bars: 20  $\mu$ m.)

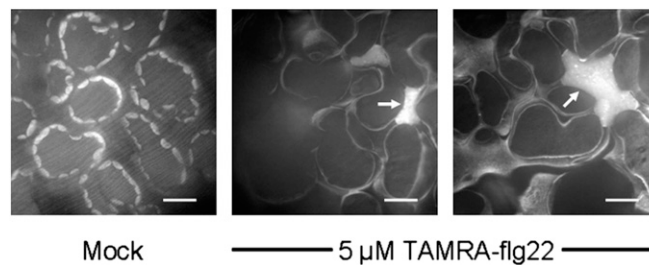

**Fig. S2.** Localization of TAMRA-flg22 fluorescent-labeled peptide after syringe infiltration. Z series was collected at 3 h after syringe infiltration of WT Col-0 leaves with either H<sub>2</sub>O (mock) or 5  $\mu$ M TAMRA-flg22 fluorescent peptide. Only autofluorescence from chloroplasts was observed in mock-treated samples. TAMRA-flg22 showed uneven accumulation and concentration in pools indicated by arrows. Note that chloroplast autofluorescence is relatively weak and not observed during visualization of fluorophores with strong fluorescent signals. All panels are z-projected confocal images. (Scale bars: 20  $\mu$ m.)

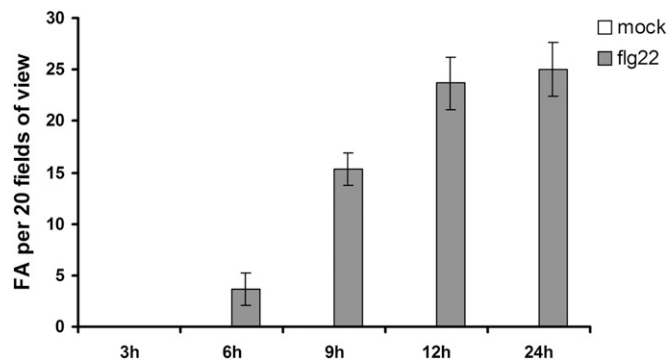

**Fig. S3.** Time course of PEN3-GFP FA after flg22 treatment. Ring-type FAs of PEN3-GFP were enumerated at 3, 6, 9, 12, and 24 h after syringe infiltration of 5  $\mu$ M flg22. FAs were counted for 20 random microscope fields of view per leaf for three leaves at each time point. Error bars represent SD ( $n = 3$ ).

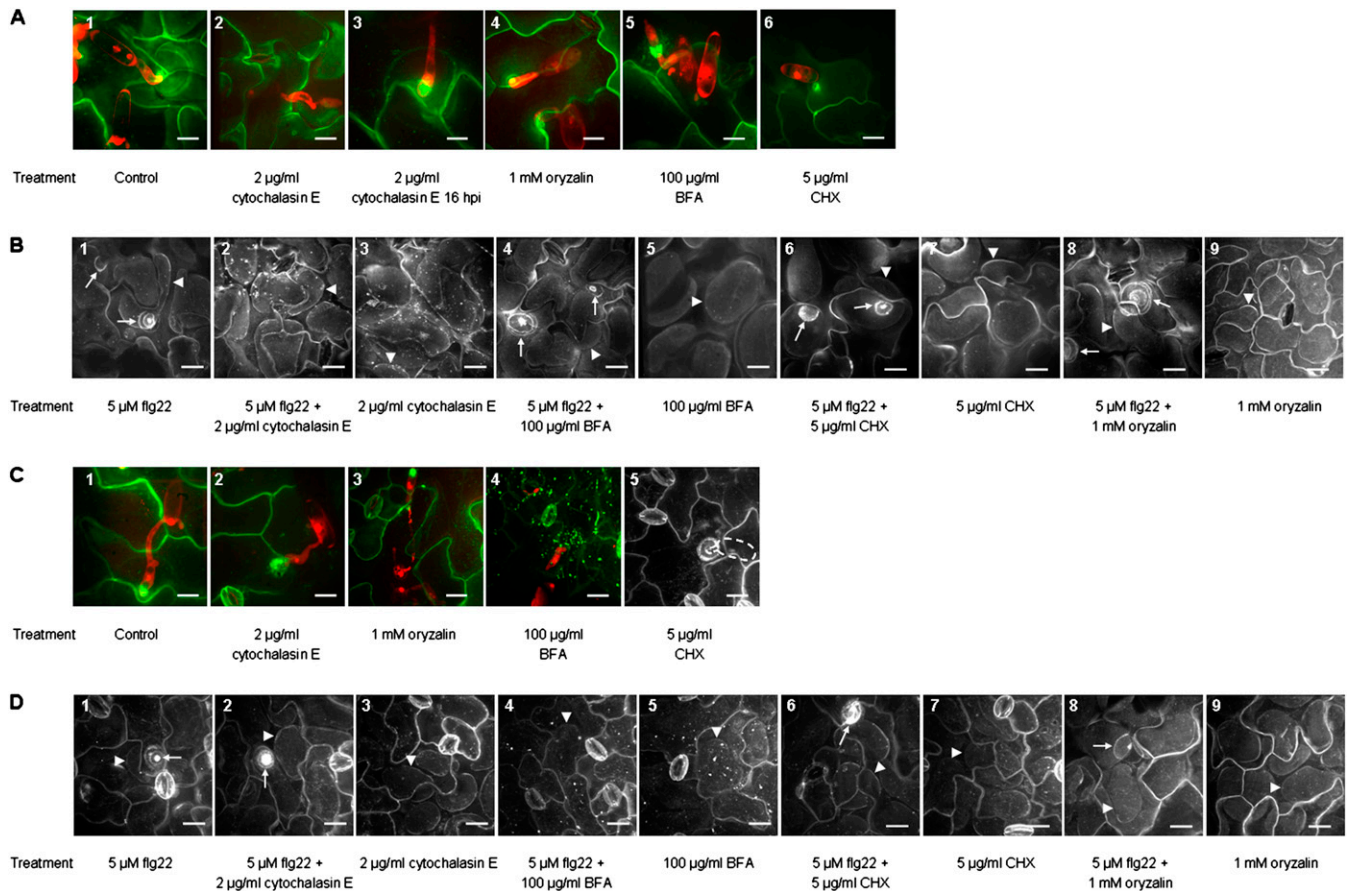

**Fig. S4.** Effects of pharmacological inhibitors on *Bgh*- and pathogen-associated molecular patterns-induced localization of PEN3 and PEN1. (A) Localization of PEN3-GFP in leaves syringe-infiltrated with 2  $\mu$ g/ml cytochalasin E, 1 mM oryzalin, 100  $\mu$ g/ml brefeldin A (BFA), 5  $\mu$ g/ml CHX, or control treatments at 1 h before inoculation with *Bgh* (1, 2, and 4–6) or 16 hpi (3). Images were collected at 24 hpi (1, 2, and 4–6) or 40 hpi (3). Control treatments ( $H_2O$  + solvent) were performed for each inhibitor, and representative controls are shown. GFP fusions appear green. Propidium iodide-stained fungal structures appear red. (B) Localization of PEN3-GFP 24 h after syringe infiltration with 5  $\mu$ M flg22 (1), 2  $\mu$ g/ml cytochalasin E (2), 100  $\mu$ g/ml BFA (5), 5  $\mu$ g/ml CHX (7), or 1 mM oryzalin (9) alone or after coinfiltration with flg22 + cytochalasin E (2), flg22 + BFA (4), flg22 + CHX (6), or flg22 + oryzalin (8). Arrowheads indicate PEN3-GFP-labeled PM outlines of leaf mesophyll cells. Arrows indicate rings of PEN3-GFP FA. (C) Localization of GFP-PEN1 in leaves syringe-infiltrated with 2  $\mu$ g/ml cytochalasin E, 1 mM oryzalin, 100  $\mu$ g/ml BFA, 5  $\mu$ g/ml CHX, or control treatments at 1 h before inoculation with *Bgh*. Images were collected at 24 hpi. Control treatments ( $H_2O$  + solvent) were performed for each inhibitor, and representative controls are shown. In 1–4, GFP fusions appear green, and propidium iodide-stained fungal structures appear red. In 5, the dashed white outline indicates the position of the *Bgh* conidiospore. Note that, in 4, no FA of GFP-PEN1 is observed at the tip of the appressorium, and in 5, GFP-PEN1 FA appears near the tip of the primary germ tube. (D) Localization of GFP-PEN1 24 h after syringe infiltration with 5  $\mu$ M flg22 (1), 2  $\mu$ g/ml cytochalasin E (3), 100  $\mu$ g/ml BFA (5), 5  $\mu$ g/ml CHX (7), or 1 mM oryzalin (9) alone or after coinfiltration with flg22 + cytochalasin E (2), flg22 + BFA (4), flg22 + CHX (6), or flg22 + oryzalin (8). Arrowheads indicate GFP-PEN1-labeled PM outlines of leaf mesophyll cells. Arrows indicate rings of GFP-PEN1 FA. All image panels are z-projected confocal images. (Scale bars: 20  $\mu$ m.)

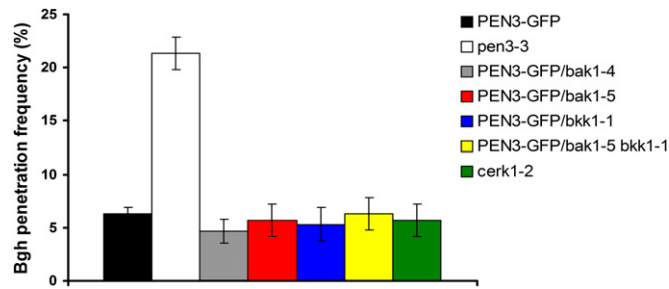

**Fig. S5.** *Bgh* penetration frequencies on *bak1* and *bkk1* mutants. Penetration frequencies on PEN3-GFP (black), *pen3-3* (white), PEN3-GFP/*bak1-4* (gray), PEN3-GFP/*bak1-5* (red), PEN3-GFP/*bkk1-1* (blue), PEN3-GFP/*bak1-5 bkk1-1* (yellow), and *cerk1-2* (green) were determined by scoring for presence or absence of haustoria at 100 infection sites per leaf for three leaves per plant line 48 hpi. Error bars represent SD ( $n = 3$ ).

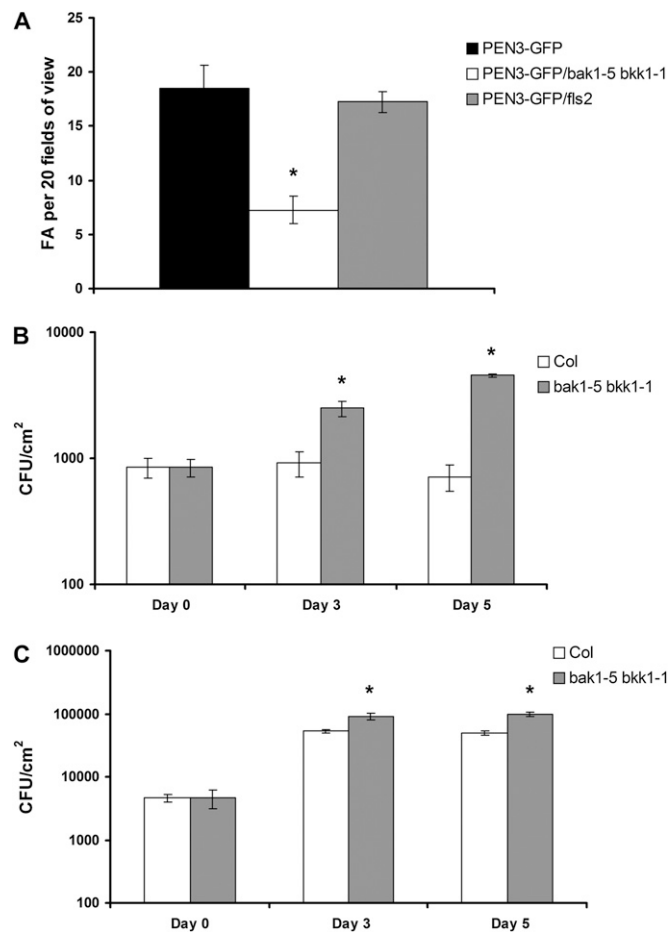

**Fig. S6.** Bacteria-induced PEN3-GFP FA in *bak1-5 bkk1-1* and *fls2* mutants and bacterial multiplication in *bak1-5 bkk1-1*. (A) Quantitative display of the frequency of PEN3-GFP FAs in WT background (PEN3-GFP; black), *bak1-5 bkk1-1* double mutant (white), or *fls2* mutant (gray) leaves at 24 h after inoculation with  $10^8$  cfu/mL *E. coli* DH5α bacteria. FAs were enumerated for 20 random microscope fields of view per leaf for three leaves per line. Error bars represent SD. Asterisk indicates significant difference ( $P < 0.05$ ; Tukey honestly significant difference test). (B) Multiplication of *E. coli* DH5α in WT Col-0 and *bak1-5 bkk1-1* mutant leaves. Bacterial populations were extracted at 0, 3, and 5 d after syringe infiltration with  $10^6$  cfu/mL bacterial suspension in H<sub>2</sub>O. Population numbers were normalized to equalize day 0 values for comparison. Error bars represent SEM. Asterisks indicate significant differences ( $P < 0.05$ ; Student *t* test). (C) Multiplication of *P. syringae* pv. *tomato* DC3000 *hrcC* in WT Col-0 and *bak1-5 bkk1-1* mutant leaves. Bacterial populations were extracted at 0, 3, and 5 d after syringe infiltration with  $10^6$  cfu/mL bacterial suspension in H<sub>2</sub>O. Population numbers were normalized to equalize day 0 values for comparison. Error bars represent SEM. Asterisks indicate significant differences ( $P < 0.05$ ; Student *t* test).



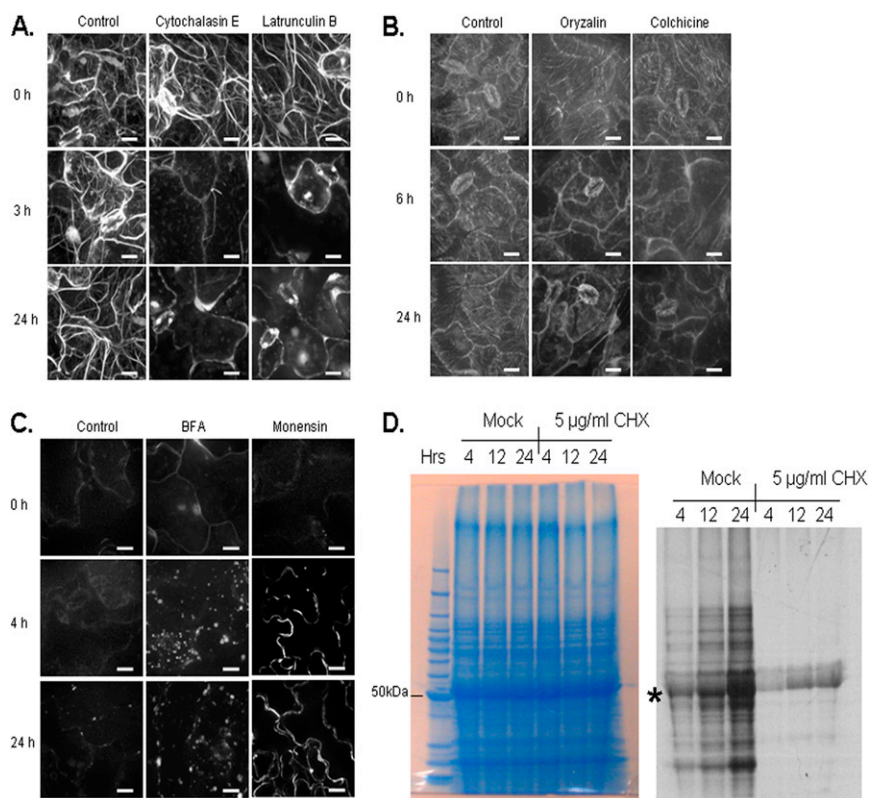

**Fig. S7.** Efficacy of pharmacological inhibitors. (A) Actin filaments visualized in plants expressing GFP-talin after syringe infiltration with (Center) 2 µg/mL cytochalasin E, (Right) 20 µM latrunculin B, or (Left) a control (H<sub>2</sub>O + solvent) treatment. Images were collected at (Top) 0, (Middle) 3, and (Bottom) 24 h after inhibitor treatment. (B) Microtubules visualized in plants expressing GFP-β-tubulin fusion protein after syringe infiltration with (Center) 1 mM oryzalin, (Right) 40 µg/mL colchicine, or (Left) a control (H<sub>2</sub>O + solvent) treatment. Images were collected at (Top) 0, (Middle) 6, and (Bottom) 24 h after inhibitor treatment. (C) Localization of secretion-targeted GFP variant in leaves syringe-infiltrated with (Center) 100 µg/mL BFA, (Right) 1 µM monensin, or (Left) a control (H<sub>2</sub>O + solvent) treatment. Images were collected (Top) 0, (Middle) 4, and (Bottom) 24 h after inhibitor treatment. Note that secretion-targeted GFP is poorly visualized in control-treated samples because of low apoplastic pH, but it accumulates intracellularly in the presence of BFA and monensin. All panels are z-projected confocal images. (Scale bars: 20 µm.) (D) Effect of 5 µg/mL CHX on incorporation of <sup>35</sup>S-labeled methionine and cysteine into newly synthesized proteins. (Left) Gelcode Blue-stained gel image and (Right) autoradiography are shown. Leaves infiltrated with 5 µg/mL CHX or H<sub>2</sub>O were collected at the times indicated for protein extraction. Asterisk indicates the position of the large subunit of ribulose biphosphate carboxylase, an abundant leaf protein synthesized in chloroplasts. Synthesis of proteins by chloroplast and mitochondrial ribosomes has previously been shown to be insensitive to CHX (1, 2). Note that a minimum of 2 h passes before conidia start to germinate, producing primary germ tubes that are incapable of forming haustoria. By about 6 h after inoculation, appressorial germ tubes have formed, and by 14 hpi, immature haustoria can be observed, suggesting that the plant cuticle and cell wall are breached by *Bgh* in this time frame (3). Thus, by the time that *Bgh* initiates an attack on the plant, the inhibitors used in this study will be fully effective.

1. Dai H, Lo Y-S, Charn C-G, Ruddat M, Chiang K-S (1993) Characterization of protein-synthesis by isolated rice mitochondria. *Theor Appl Genet* 86(2-3):312-316.
2. Smillie RM, Scott NS, Graham D (1968) Biogenesis of chloroplasts: Roles of chloroplast DNA and chloroplast ribosomes. *Comparative Biochemistry and Biophysics of Photosynthesis*, eds Takamiya A, Jagendorf AT, Fuller RC (University of Tokyo Press, Tokyo), pp 332-359.
3. Kerby K, Somerville S (1989) Enhancement of specific intercellular peroxidases following inoculation of barley with *Erysiphe graminis* f. sp. *hordei*. *Physiol Mol Plant Pathol* 35(4):323-337.

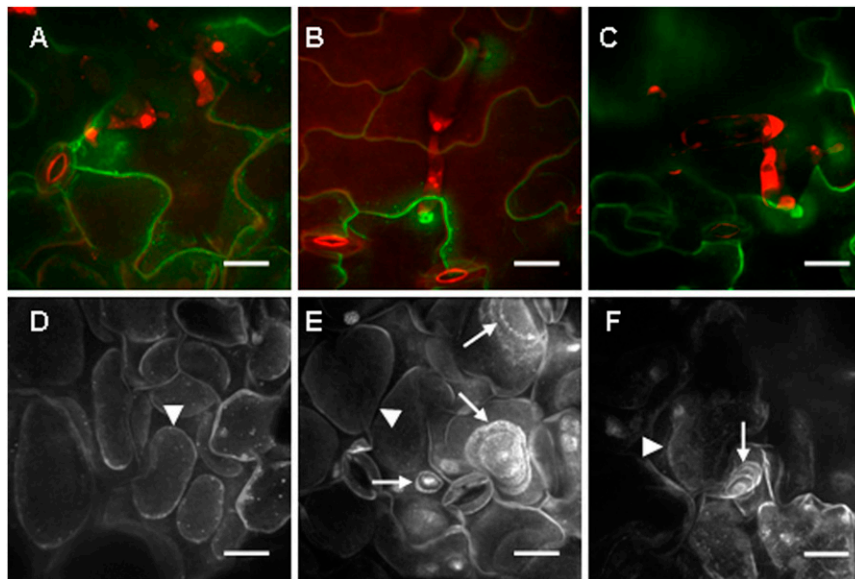

**Fig. 58.** Effects of latrunculin B, colchicine, and monensin on PEN3 localization. (A) Localization of PEN3-GFP in leaves syringe-infiltrated with 20  $\mu\text{M}$  latrunculin B 1 h before inoculation with *Bgh*. (B) Localization of PEN3-GFP in leaves syringe-infiltrated with 40  $\mu\text{g/mL}$  colchicine 1 h before inoculation with *Bgh*. (C) Localization of PEN3-GFP in leaves syringe-infiltrated with 1  $\mu\text{M}$  monensin 1 h before inoculation with *Bgh*. (D) Localization of PEN3-GFP in leaves coinfiltrated with 20  $\mu\text{M}$  latrunculin B + 5  $\mu\text{M}$  flg22. (E) Localization of PEN3-GFP in leaves coinfiltrated with 40  $\mu\text{g/mL}$  colchicine + 5  $\mu\text{M}$  flg22. (F) Localization of PEN3-GFP in leaves coinfiltrated with 1  $\mu\text{M}$  monensin + 5  $\mu\text{M}$  flg22. Images were collected at 24 h after *Bgh* inoculation or flg22 infiltration. In A–C, PEN3-GFP appears green, and propidium iodide-stained fungal structures appear red. Note that accumulation of PEN3-GFP at the tip of the fungal appressorium is not observed in A. In D–F, arrowheads indicate PEN3-GFP-labeled PM outlines of leaf mesophyll cells, and in E and F, arrows indicate rings of PEN3-GFP FA. All panels are z-projected confocal images. (Scale bars: 20  $\mu\text{m}$ .)

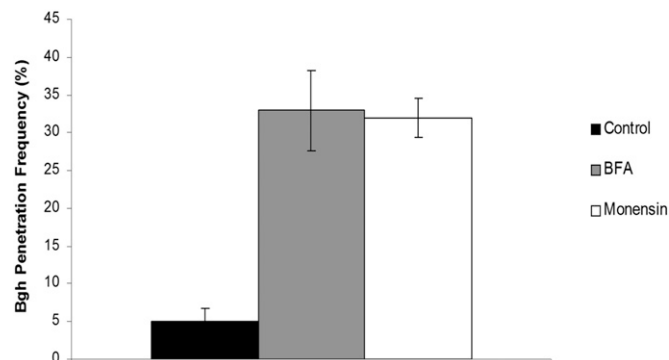

**Fig. 59.** Vesicle trafficking inhibitors impair penetration defense. Penetration frequency of *Bgh* on leaves syringe-infiltrated with 100  $\mu\text{g/mL}$  BFA, 1  $\mu\text{M}$  monensin, or a control ( $\text{H}_2\text{O}$  + solvent) treatment 1 h before inoculation with the fungus. Penetration frequency was determined by scoring for presence or absence of haustoria at 100 infection sites per leaf for three leaves per plant line 48 hpi. Error bars represent SD ( $n = 3$ ). The experiment was repeated three times with similar results.
